# Supplementary material
Source: Springer Nature journal article supplement (https://www.springermedizin.de/resource/supplementary/12936_2013_3100_MOESM2_ESM.pdf/9545950)
Supplement: MOESM2 [file 9545950]

Total screened: 1,894

Burkina-Faso: 746

Mali: 1,148

434 Excluded  
428 Negative microscopy  
1 HIV positive  
3 Refusals  
2 Did not return

880 Excluded  
862 Negative microscopy  
16 Previous SP or other antimalarials  
1 Refusal  
1 Fever

Enrolled: 312

Enrolled: 268

Gravida 1&2: 204

Gravida  $\geq$ 3: 108

Gravida 1&2: 185

Gravida  $\geq$ 3: 83

Moved= 0  
Not traced=1  
Refusal=2  
Other= 2

Moved= 1  
Not traced=0  
Refusal=0  
Other= 0

Moved= 2  
Not traced=2  
Refusal=2  
Other= 1

Moved= 1  
Not traced=0  
Refusal=0  
Other= 0

Day 14: 199

Day 14: 107

Day 14: 178

Day 14: 82

Moved= 2  
Not traced=0  
Refusal=2  
Other= 4

Moved= 0  
Not traced=0  
Refusal=0  
Other=0

Moved= 0  
Not traced=1  
Refusal=0  
Other= 0

Moved= 0  
Not traced=0  
Refusal=0  
Other= 0

Day 28: 191

Day 28: 107

Day 28: 177

Day 28: 82

Moved= 0  
Not traced=1  
Refusal=0  
Other= 2

Moved= 0  
Not traced=1  
Refusal=0  
Other= 0

Moved= 0  
Not traced=3  
Refusal=0  
Other= 2

Moved= 0  
Not traced=0  
Refusal=0  
Other= 1

Day 42: 188

Day 42: 106

Day 42: 172

Day 42: 81
